# Supplementary material for: Tumor-triggered targeting ammonium bicarbonate liposomes for tumor multimodal therapy
Source: Royal Society of Chemistry journal article supplement (doi:10.1039/d2tb00409g), 2022-01-01
Supplement: d2tb00409g1.pdf [file d2tb00409g1.pdf]

## Supporting Information

### Tumor-Triggered Targeting Ammonium Bicarbonate Liposomes for Tumor

#### Multimodal Therapy

*Quan-Bing Chen, Mei-Hua Shen, Xiao-He Ren, Shuai Zhu, Jin-Ting Shang, Wei Liu, Zhao-Wei Zhang, Zhi-Jun Dong, Hua-Zhi Gu, Xian-Zheng Zhang, Qiong Yuan\*, and Tao Zou\**

Q.-B. Chen, S. Zhu, Prof. Z.-J. Dong, Prof. H.-Z. Gu, and Prof. T. Zou  
State Key Laboratory of Refractories and Metallurgy, Key Laboratory of Coal  
Conversion and New Carbon Materials of Hubei Province  
School of Chemistry and Chemical Engineering  
Wuhan University of Science and Technology  
Wuhan 430081, P. R. China.  
E-mail: taozou@wust.edu.cn

M.-H. Shen, Prof. Q. Yuan  
Institute of Pharmaceutical Innovation  
College of Medicine  
Wuhan University of Science and Technology  
Wuhan 430065, P. R. China  
E-mail: yuanqiong@wust.edu.cn

X.-H. Ren, Prof. X.-Z. Zhang  
Key Laboratory of Biomedical Polymers of Ministry of Education  
Department of Chemistry  
Wuhan University  
Wuhan 430072, P. R. China

Dr. J.-T. Shang, Dr. W. Liu  
School of Medicine  
Jiangnan University  
Wuhan 430056, P. R. China

Prof. Z.-W. Zhang  
Key Laboratory of Biology and Genetic Improvement of Oil Crops, Key Laboratory  
of Detection for Mycotoxins, Ministry of Agriculture and Rural Affairs, National  
Reference Laboratory for Agricultural Testing (Biotoxin)  
Oil Crops Research Institute of the Chinese Academy of Agricultural Sciences

Wuhan 430062, P. R. China

### Materials

The cholesterol (Chol), 1,2-Dipalmitoyl-sn-glycero-3-phosphocholine (DPPC), and 1,2-distearoyl-sn-glycero-3-phosphateethanolamine-N-(amino-(polyethyleneglycol)-2000) (DSPE-PEG<sub>2000</sub>) were supplied by Avanti Polar Lipids (USA). The 1,2 - stearyl - sn - glycerol - 3 - phosphatethanolamine (DSPE) and 1,2 - distearoyl - sn - glycerol - 3 - phosphoethanolamine - N - [ folate (polyethylene glycol) - 2000] (DSPE - PEG<sub>2000</sub> - FA) were supplied by AVT (Shanghai, China). Doxorubicin hydrochloride (DOX) and indocyanine green (ICG) were supplied by Melonepharma (Dalian, China). Methoxy PEG<sub>5000</sub> propionaldehyde (mPEG<sub>5000</sub> - CHO) was supplied by JenKem Technology (Beijing, China), and other chemicals were supplied by Sinopharm Chemical Reagent Co. Ltd, China.

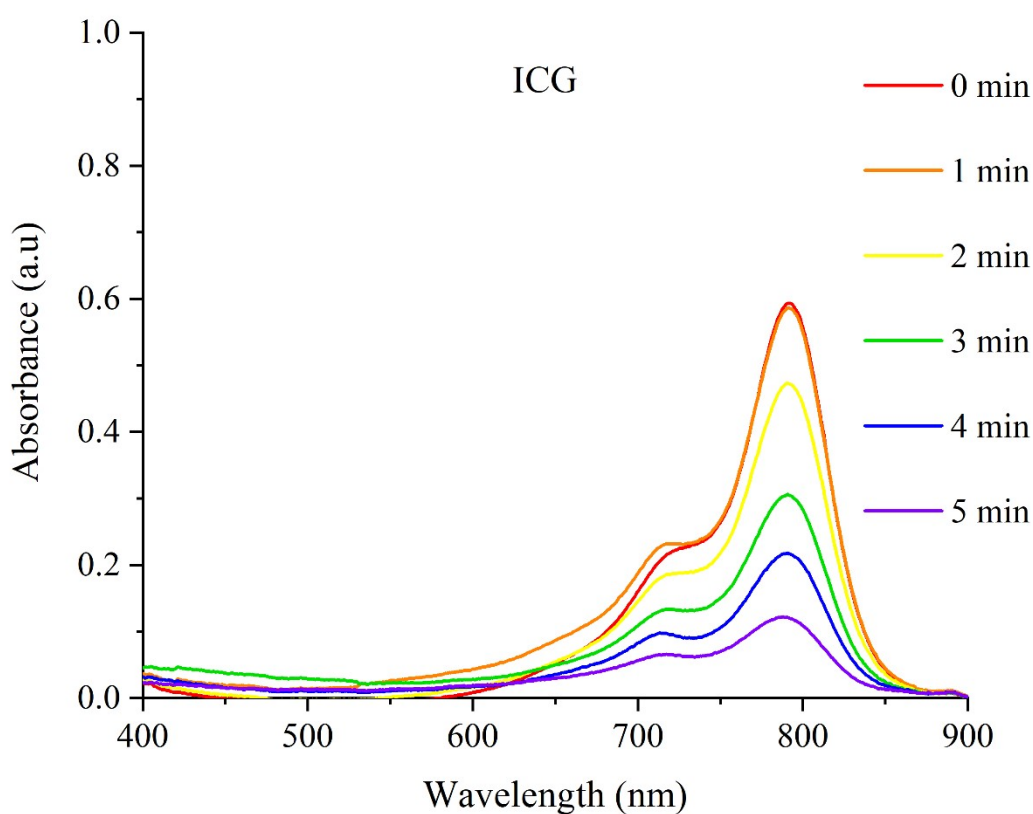

Figure S1 UV-visible absorption spectra of free ICG

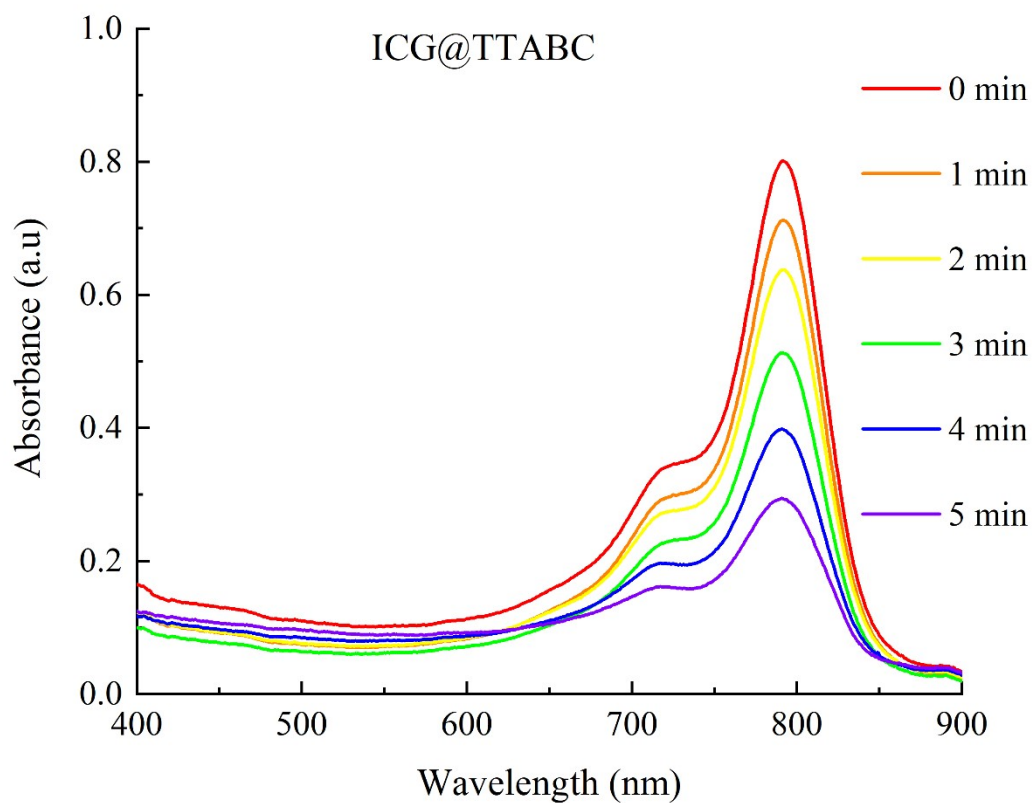

Figure S2 UV-visible absorption spectra of ICG@TTABC

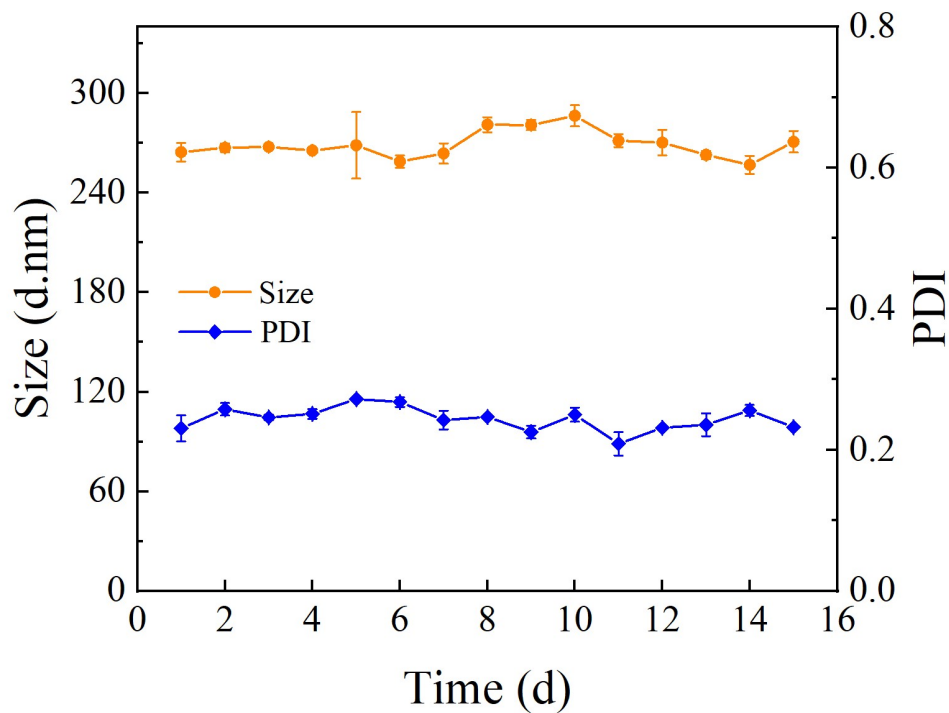

Figure S3 Hydrodynamic size of ICG&DOX@TTABC within 15 days

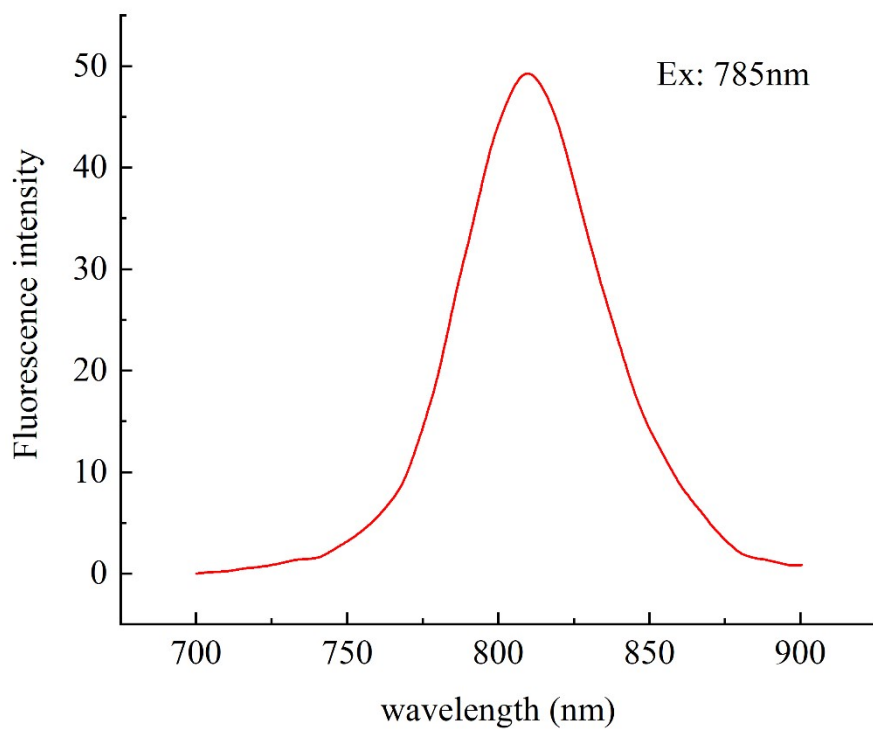

Figure S4 Fluorescence emission spectrum of ICG

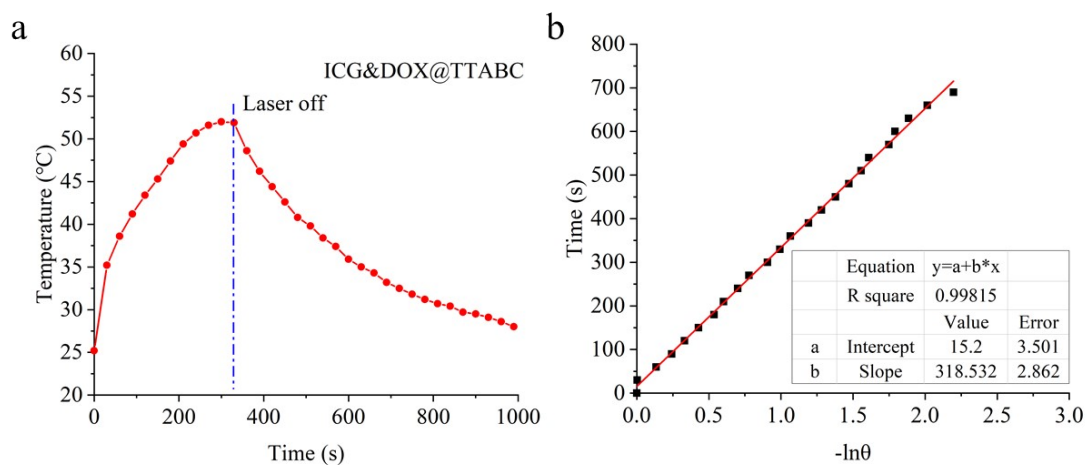

Figure S5 a) The photothermal response of the ICG&DOX@TTABC aqueous solution irradiated with NIR laser (808 nm, 1.5 W/cm<sup>2</sup>) for 330 s, and then the laser was shut off. b) Linear time data *versus* Ln $\theta$  obtained from the cooling period of panel.

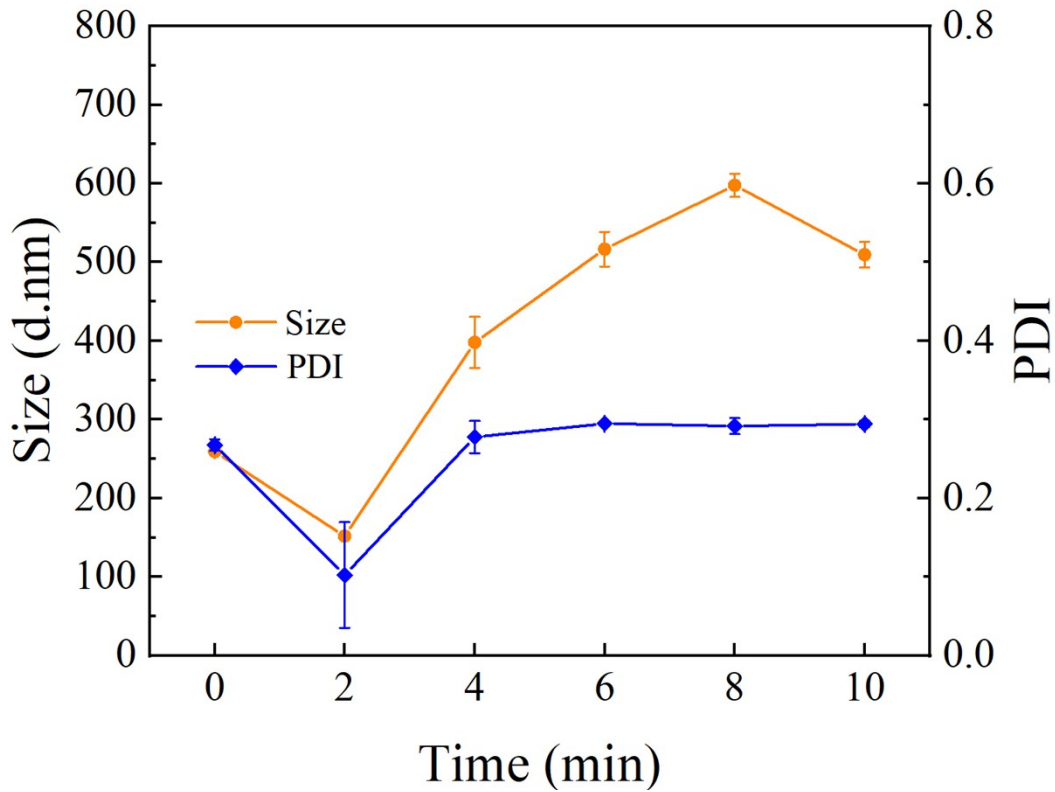

Figure S6 Hydrodynamic size of ICG&DOX@TTABC versus irradiation time (808 nm, 1.5 W/cm<sup>2</sup>)

### Calculation of the photothermal conversion efficiency

The photothermal conversion efficiency of ICG&DOX@TTABC was determined according to previous method.<sup>1-3</sup>

$$\sum_i m_i c_{i,p} \frac{dT}{dt} = Q_{NCs} + Q_{Dis} - Q_{Surr} \quad (1)$$

where  $m$  and  $C_{i,p}$  are the mass and heat capacity of water, respectively.  $T$  is the solution temperature,  $Q_{NCs}$  is the energy inputted by ICG&DOX@TTABC,  $Q_{Dis}$  is the baseline energy inputted by the sample cell, and  $Q_{Surr}$  is heat conduction away from the system surface by air.

$Q_{NCs}$  is the photothermal energy input by ICG&DOX@TTABC.

$$Q_{NCs} = I(1 - 10^{-A_\lambda})\eta \quad (2)$$

where  $I$  is incident laser power,  $\eta$  is the conversion efficiency from incident laser energy to thermal energy, and  $A_\lambda$  is the absorbance of the ICG&DOX@TTABC at wavelength of 808 nm. In addition, source term,  $Q_{Dis}$  is the heat associated with the light absorbance of the solvent, which is measured independently to be  $Q_{Dis} = 18.9$  mW using pure water without ICG&DOX@TTABC. Furthermore,  $Q_{Surr}$  is thermal energy lost to the surroundings.

$$Q_{Surr} = hS(T - T_{Surr}) \quad (3)$$

where  $h$  is heat transfer coefficient,  $S$  is the surface area of the container, and  $T_{Surr}$  is ambient temperature of the surroundings.

Once the laser power is defined, the heat input ( $Q_{NC} + Q_{Dis}$ ) will be finite. Since the heat output ( $Q_{Surr}$ ) is increased along with the increase of the temperature according to the Eq.3, the system temperature will rise to a maximum when the heat input is equal to heat output:

$$Q_{NCs} + Q_{Dis} = Q_{Surr-max} = hS(T - T_{Surr}) \quad (4)$$

where the  $Q_{Surr-Max}$  is heat conduction away from the system surface by air when the sample cell reaches the equilibrium temperature, and  $T_{max}$  is the equilibrium temperature. The 808 nm laser heat conversion efficiency ( $\eta$ ) can be determined by substituting Eq.2 for  $Q_{NCs}$  into Eq. 4 and rearranging to get

$$\eta = \frac{hS(T - T_{Surr}) - Q_{Dis}}{I(1 - 10^{-A\lambda})} \quad (5)$$

where  $Q_{Dis}$  was measured independently to be 18.9 mW, the ( $T_{max} - T_{Surr}$ ) was 27.0 °C according to Figure S5a,  $I$  is 1.5 W/cm<sup>2</sup>,  $A_{808}$  is the absorbance (0.6390) of ICG&DOX@TTABC at 808 nm (Figure 2e). Thus, only the  $hS$  remains unknown for calculating  $\eta$

In order to get the  $hS$ , a dimensionless driving force temperature,  $\theta$  is introduced using the maximum system temperature,  $T_{max}$

$$\theta = \frac{T - T_{Surr}}{T_{max} - T_{Surr}} \quad (6)$$

Substituting Eq.6 into Eq.1 and rearranging Eq.1

$$\frac{d\theta}{dt} = \frac{hS}{\sum_i m_i c_{i,p}} \left[ \frac{Q_{NCs} + Q_{Dis}}{hS(T_{max} - T_{Surr})} - \theta \right] \quad (7)$$

When the laser was shut off, the  $Q_{NCs} + Q_{Dis} = 0$ , Eq.7 changed to

$$dt = \frac{\sum_i m_i c_{i,p}}{hS} \frac{d\theta}{\theta} \quad (8)$$

and integrating, giving the expression

$$t = - \frac{\sum_i m_i c_{i,p}}{hS} \ln \theta \quad (9)$$

$$\frac{\sum_i m_i c_{i,p}}{hS}$$

Therefore, time constant for heat transfer from the system is determined to be  $\frac{\sum_i m_i c_{i,p}}{hS} = 318.532$  s by applying the linear time data from the cooling period (after 330 s) vs negative natural logarithm of driving force temperature (Figure S5b). In addition, the  $m$  is 1.0 g and the  $C$  is 4.2 J/(g °C). Thus, according to Eq. 9, the  $hS$  is deduced to be 13.18 mW/°C. Substituting 13.18 mW/°C of the  $hS$  into Eq.5, the 808 nm laser heat conversion efficiency ( $\eta$ ) of ICG&DOX@TTABC can be calculated to be 29.16%.

## References

1. M. B. Zheng, P. F. Zhao, Z. Y. Luo, P. G. C. F. Zheng, P. F. Zhang, C. X. Yue, D. Y. Gao, Y. F. Ma and L. T. Cai, Robust ICG theranostic nanoparticles for folate targeted cancer imaging and highly effective photothermal therapy, *ACS Appl. Mater. Interfaces*, 2014, **6**, 6709–6716.
2. Q. W. Tian, F. R. Jiang, R. J. Zou, Q. Liu, Z. G. Chen, M. F. Zhu, S. P. Yang, J. L. Wang, J. H. Wang and J. Q. Hu, Hydrophilic Cu<sub>9</sub>S<sub>5</sub> nanocrystals: a photothermal agent with a 25.7% heat conversion efficiency for photothermal ablation of cancer cells in *vivo*, *ACS Nano*, 2011, **5**, 9761–9771.
3. H. T. Bi, Y. L. Dai, J. T. Xu, R. C. Lv, F. He, S. L. Gai, D. Yang and P. P. Yang, CuS-Pt (IV)-PEG-FA nanoparticles for targeted Photothermal and chemo-therapy, *J. Mater. Chem. B*, 2016, **4**, 5938-5946.
